# Supplementary material for: The C-Terminal Effector Domain of Non-Structural Protein 1 of Influenza A Virus Blocks IFN-β Production by Targeting TNF Receptor-Associated Factor 3
Source: Front Immunol. 2017 Jul 3;8:779. doi: 10.3389/fimmu.2017.00779 (PMC5494602; doi:10.3389/fimmu.2017.00779)

## Supplementary Material

### The C-Terminal Effector Domain of NS1 Protein of Influenza A Virus blocks IFN- $\beta$ Production by Targeting TRAF3

Wei Qian<sup>1,2</sup>, Xiaoqin Wei<sup>1,2,3</sup>, Kelei Guo<sup>1,2</sup>, Yongtao Li<sup>4</sup>, Xian Lin<sup>1,2</sup>, Zhong Zou<sup>1,2</sup>, Hongbo Zhou<sup>1,2</sup>, Meilin Jin<sup>1,2,5\*</sup>

#### \* Correspondence:

Meilin Jin  
[jml8328@126.com](mailto:jml8328@126.com)

**Figure S1. The NS1 proteins of novel H7N9 or avian H9N2 viruses did not interact with TRAF3.** 293T cells were cotransfected with plasmid expressing indicated NS1 proteins and Flag-TRAF3 (3  $\mu$ g each) for 36 h. Cell lysates were harvested, subjected to immunoprecipitation using an anti-Flag antibody, the immunoprecipitates were analyzed by immunoblotting. Expression of the transfected proteins was determined by western blotting using the indicated antibodies (bottom).

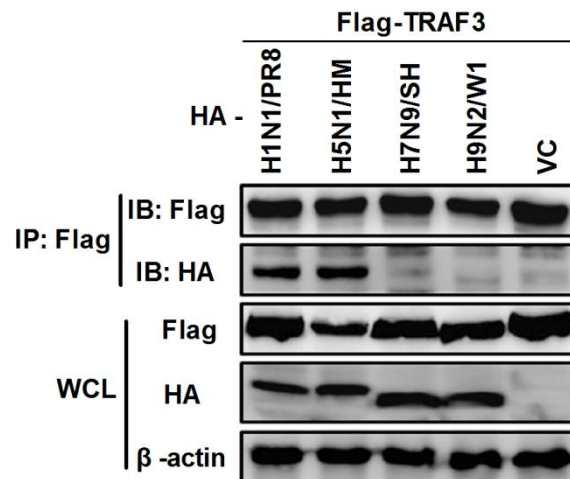

Supplement: Supplementary file 1 [file image_1.pdf]
